# Supplementary material for: Long-term variations of pH in coastal waters along the Korean Peninsula
Source: Copernicus journal article supplement (doi:10.5194/egusphere-2024-1836), 2024-06-25
Supplement: Supplementary file 1 [file egusphere-2024-1836-supplement.pdf]

## Long-term variations of pH in coastal waters along the Korean Peninsula

Yong-Woo Lee<sup>1</sup>, Mi-Ok Park<sup>1</sup>, Seong-Gil Kim<sup>1</sup>, Tae-Hoon Kim<sup>2</sup>, Yong-Hwa Oh<sup>3</sup>, Sang Heun Lee<sup>4</sup>, DongJoo Joung<sup>4,5\*</sup>

1. Marine Environment Monitoring Department, Korea Marine Environment Management Corporation, Busan, Republic of Korea;

2. Department of Oceanography, Faculty of Earth Systems and Environmental Sciences, Chonnam National University, Gwangju, Republic of Korea;

3. Department of Convergence Study on the Ocean Science and Technology, Korea Maritime and Ocean University, Busan, Republic of Korea;

4. Department of Oceanography, Pusan National University, Busan, Republic of Korea;

5. Institute for Future Earth, Pusan National University, Busan, Republic of Korea;

\*Corresponding author: [dongjoo.joung@pusan.ac.kr](mailto:dongjoo.joung@pusan.ac.kr)

Contents:

Figures: 11

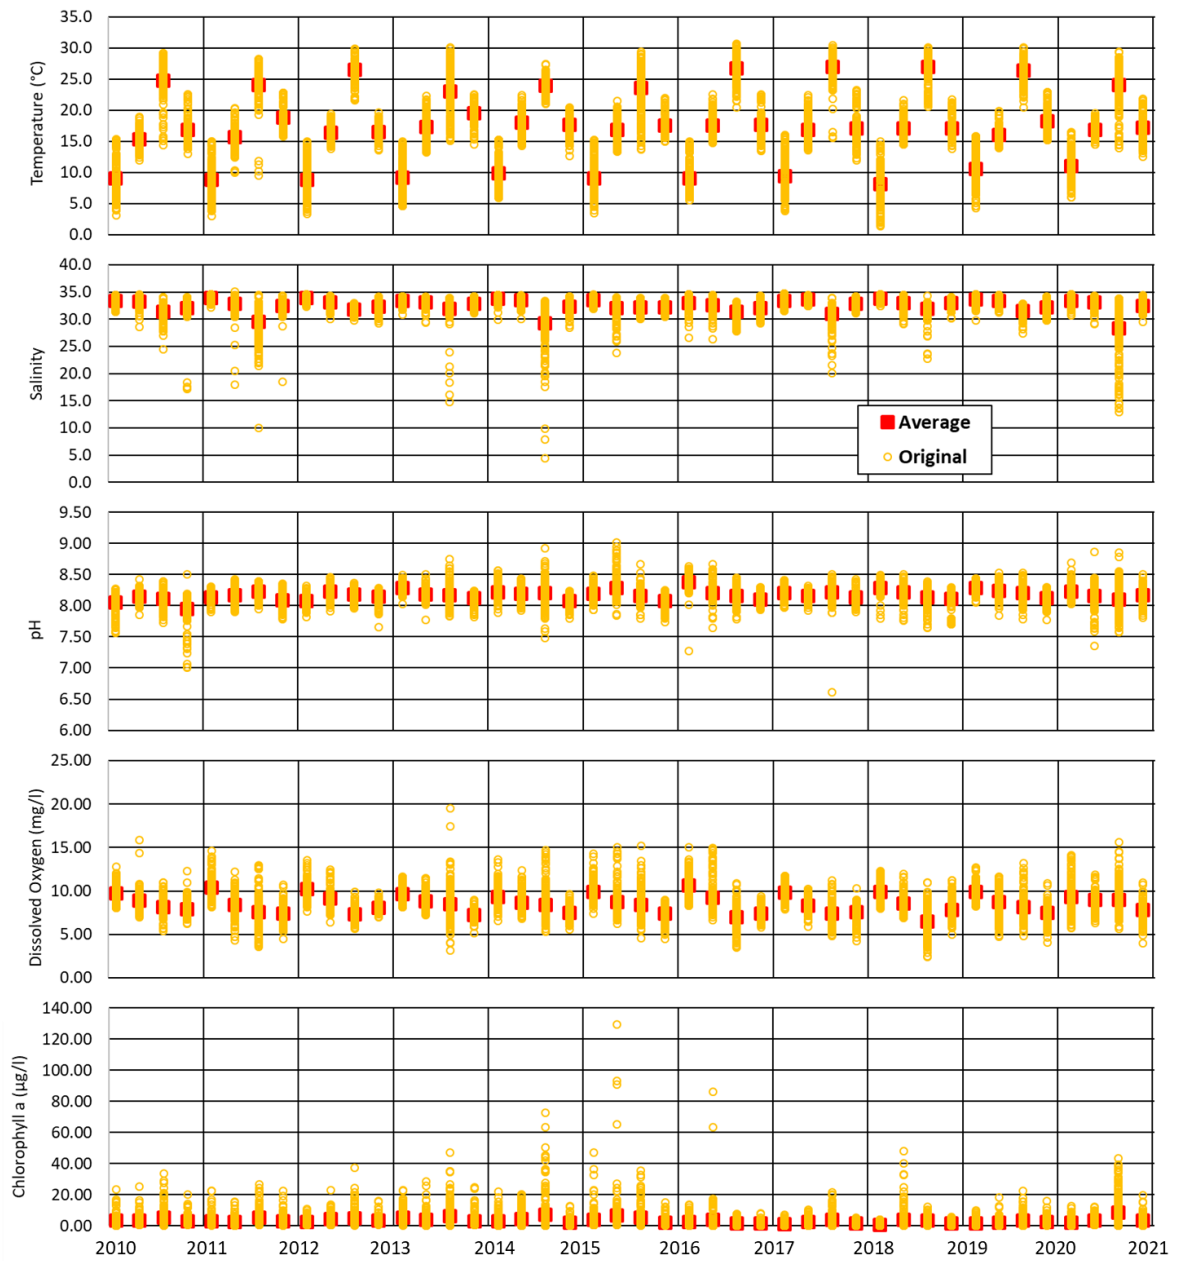

Supplementary Figure 1. Variations of parameters in surface waters from the south coast of Korea.

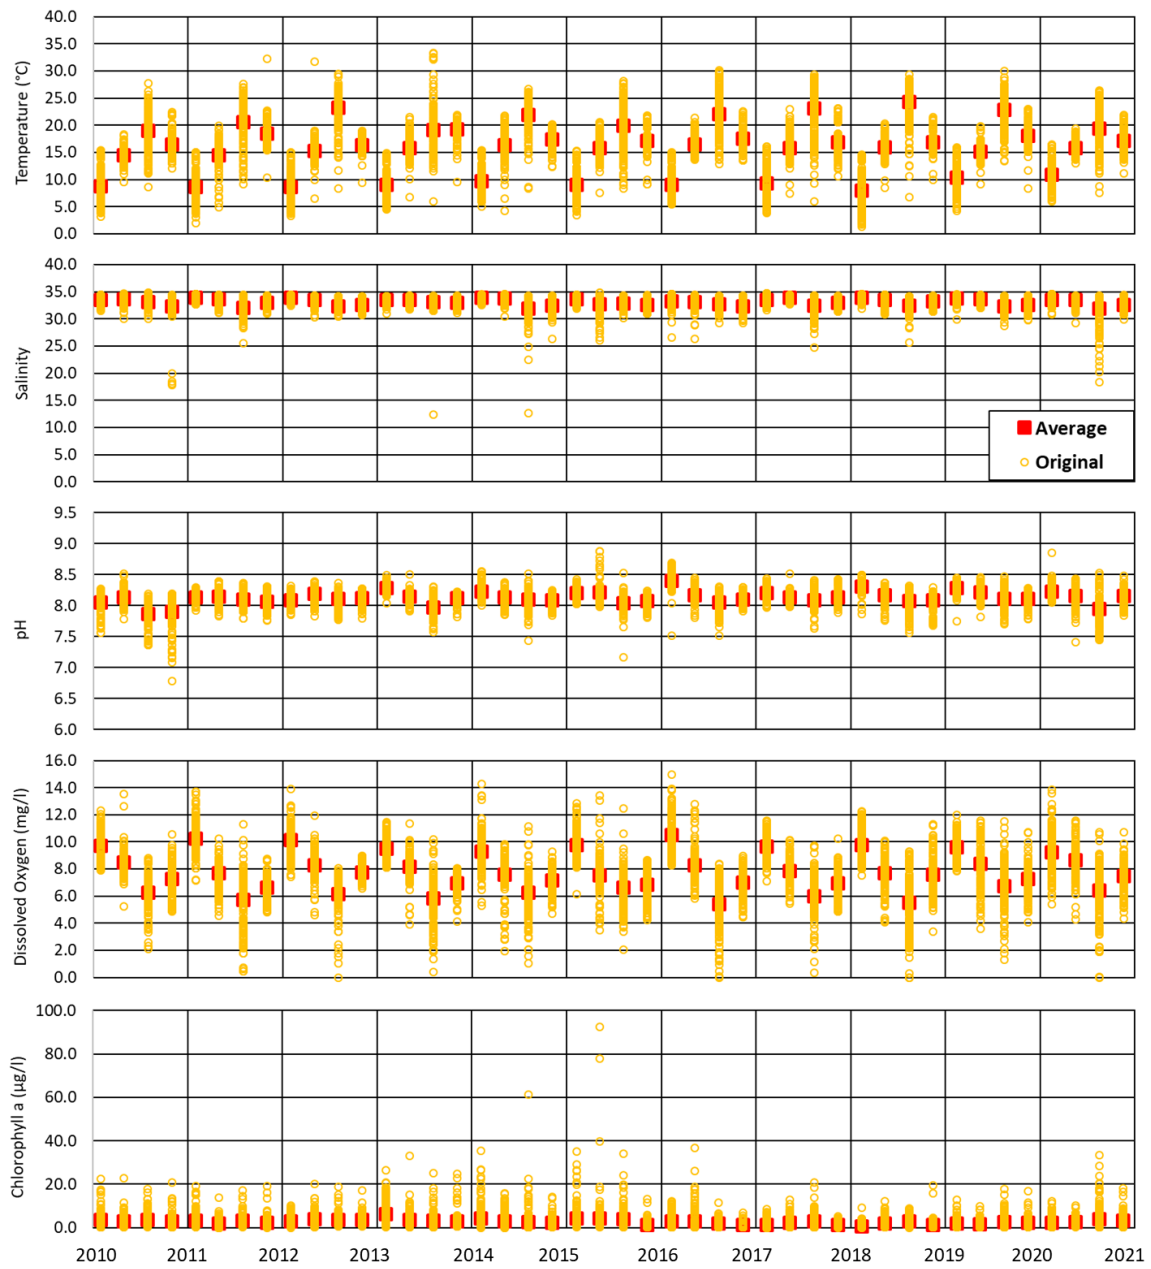

Supplementary Figure 2. Variations of parameters in bottom waters from the south coast of Korea.

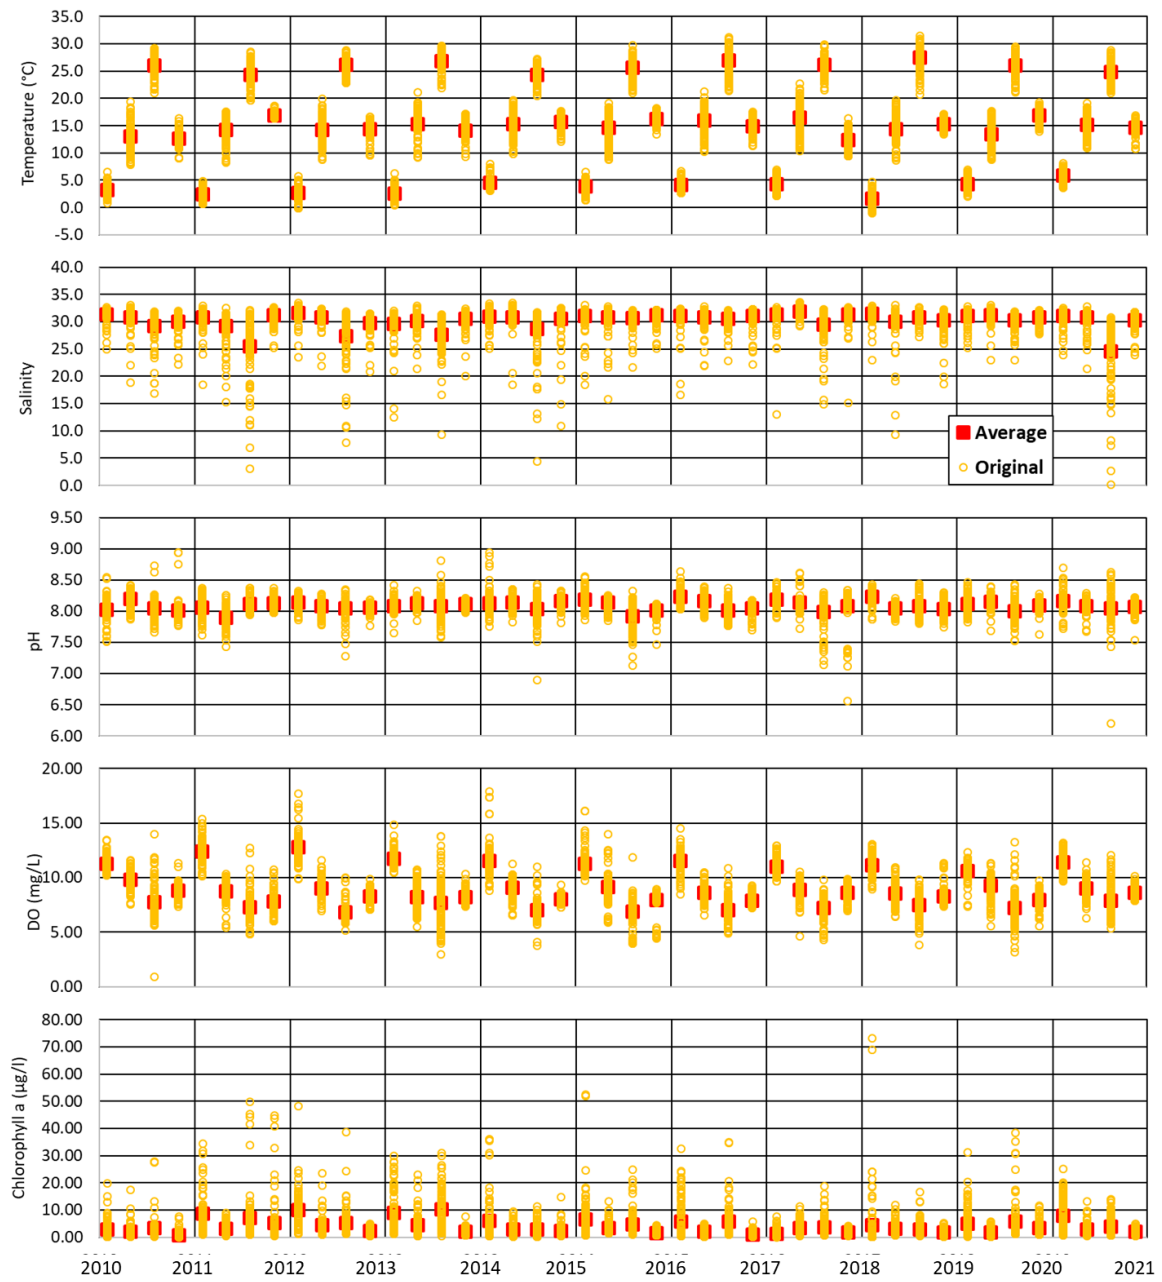

Supplementary Figure 3. Variations of parameters in surface waters from the west coast of Korea.

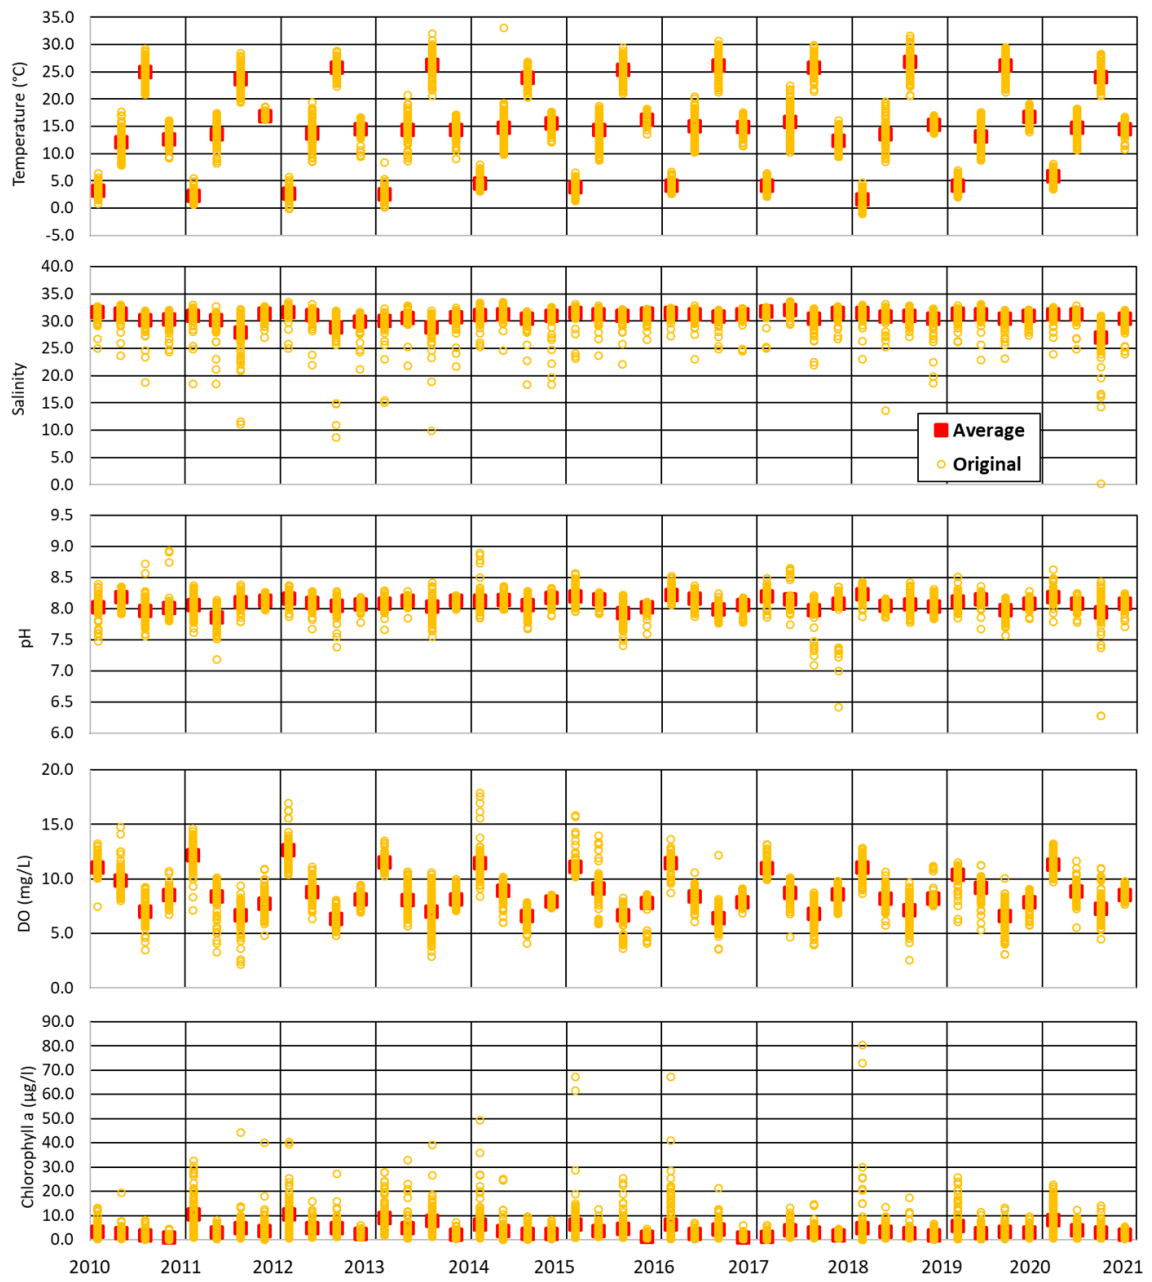

Supplementary Figure 4. Variations of parameters in bottom waters from the west coast of Korea.

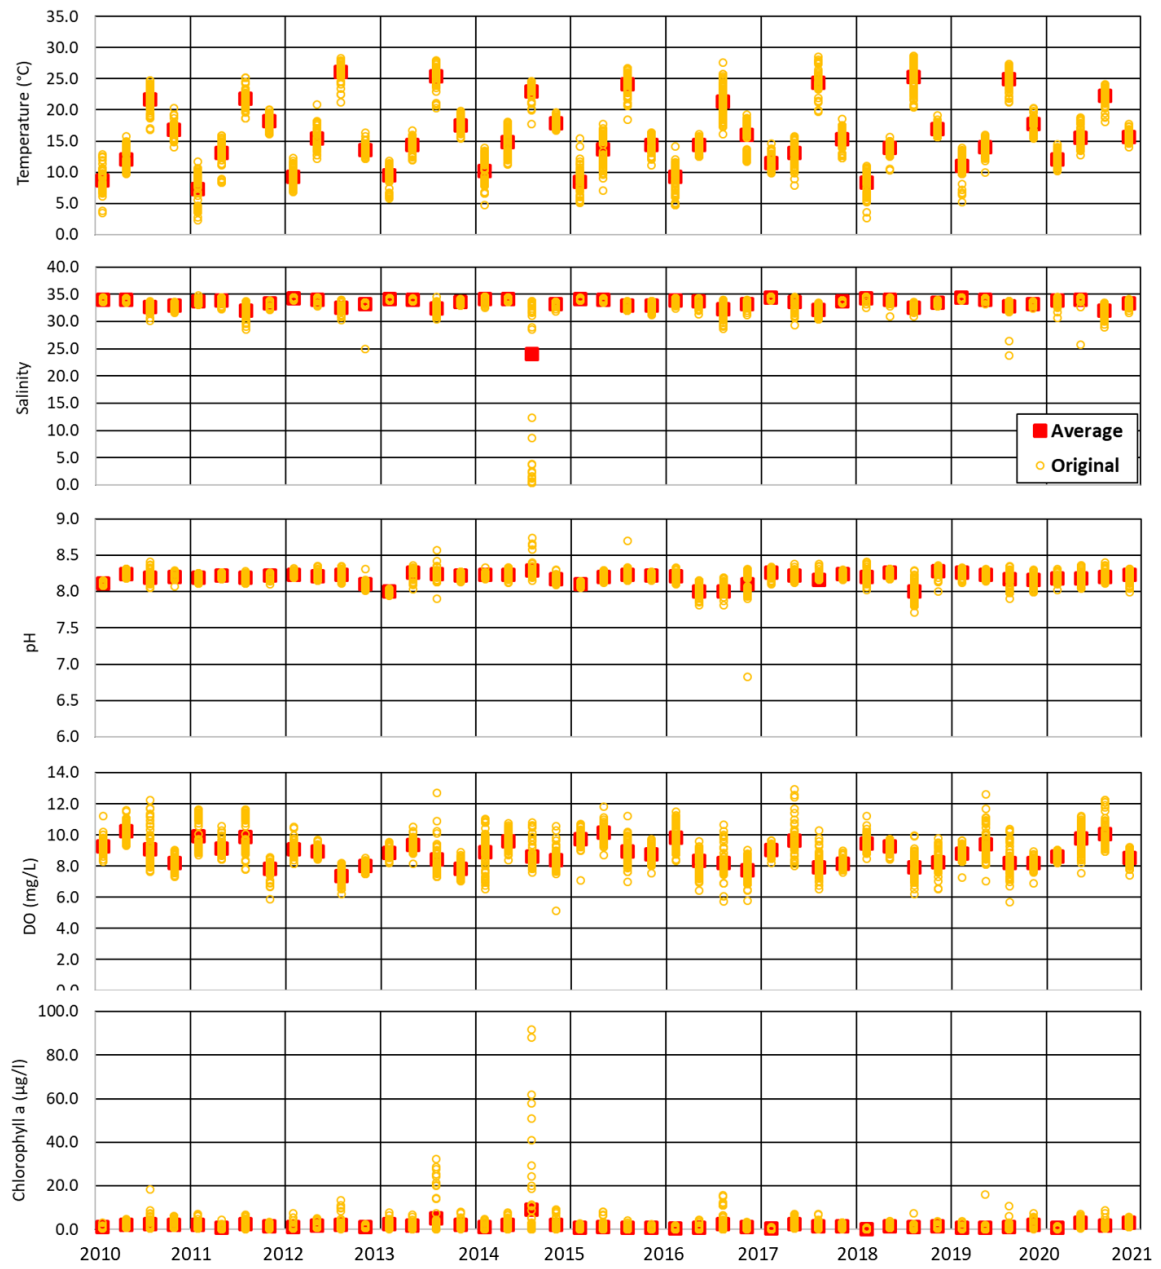

Supplementary Figure 5. Variations of parameters in surface waters from the east coast of Korea.

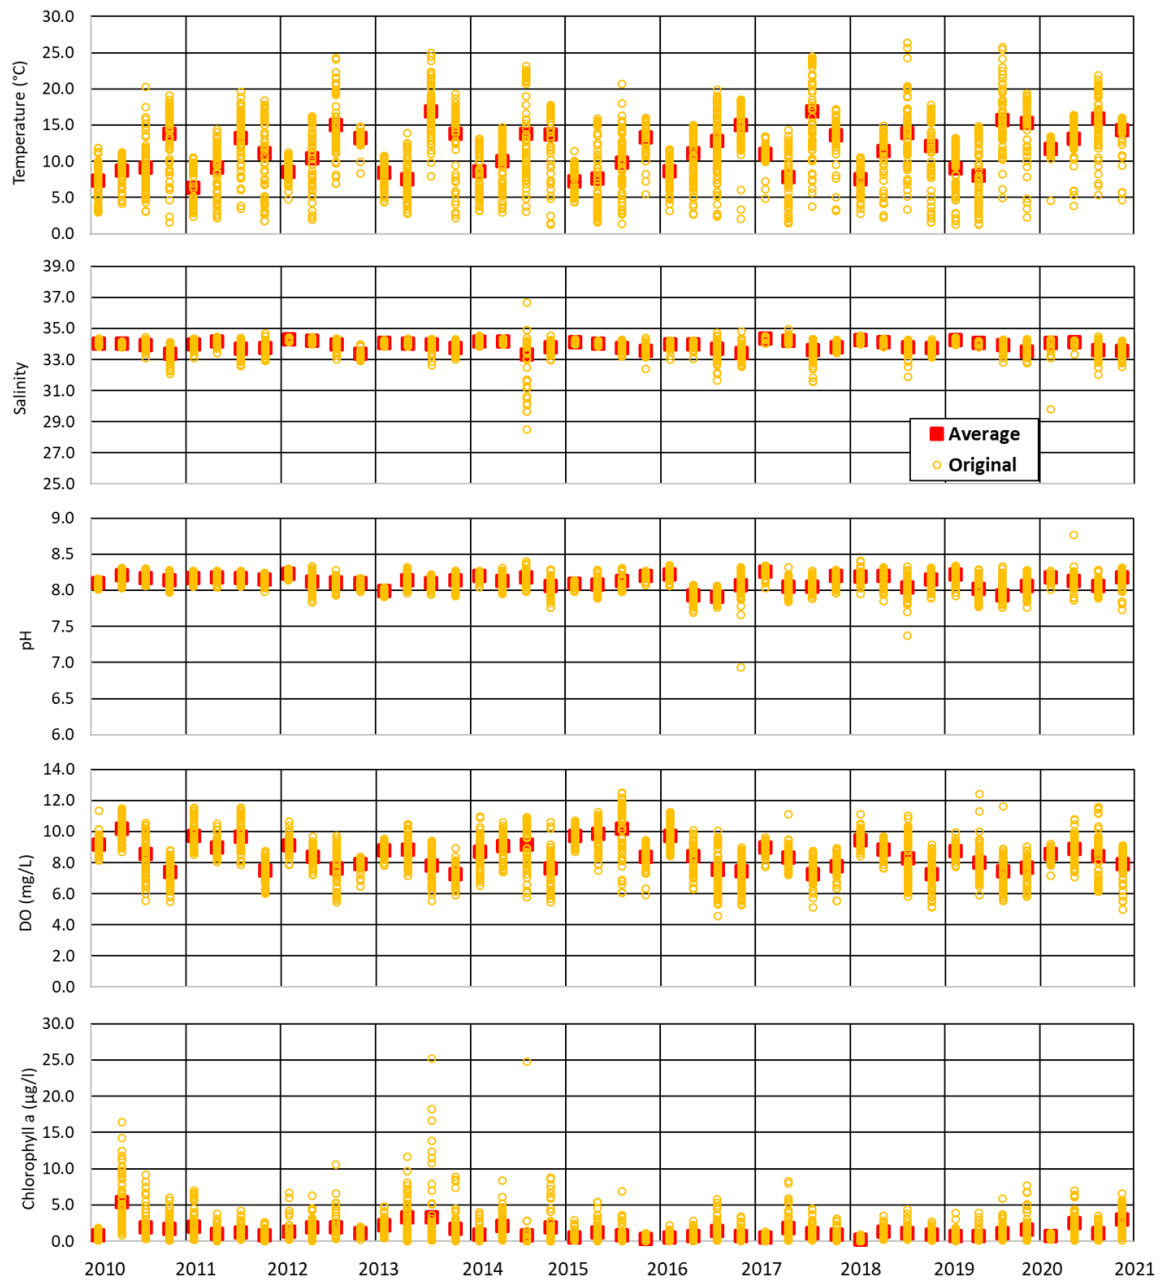

Supplementary Figure 6. Variations of parameters in bottom waters from the east coast of Korea.

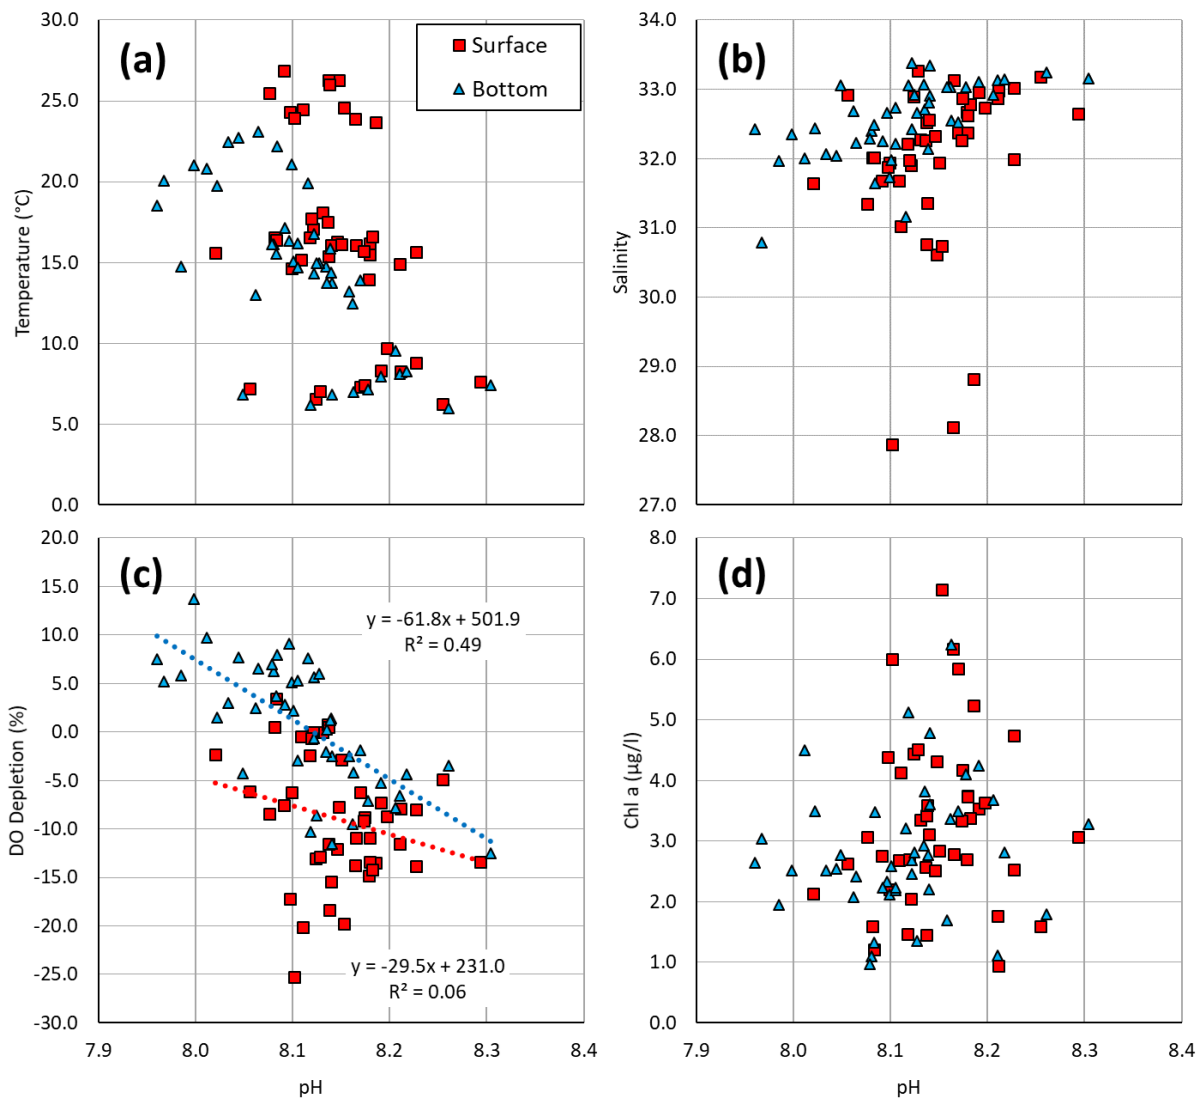

Supplementary Figure 7. Variations of pH with (a) temperature, (b) salinity, (c) DO depletion, and (d) chlorophyll-a in waters from the entire Korean coast.



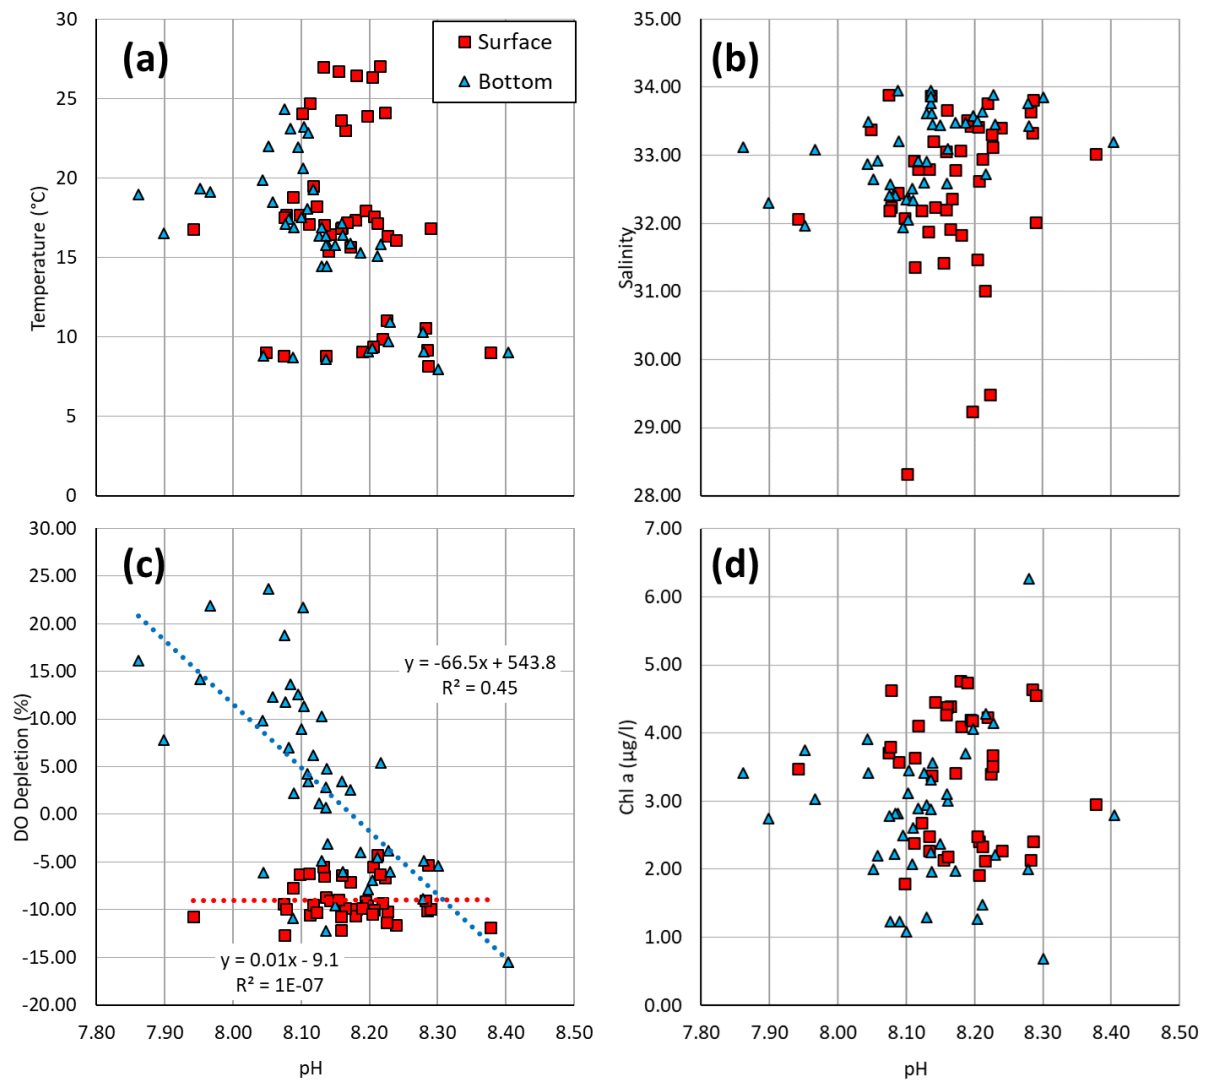

Supplementary Figure 8. Variations of pH with (a) temperature, (b) salinity, (c) DO depletion, and (d) chlorophyll-a in waters from the south coast of Korea.

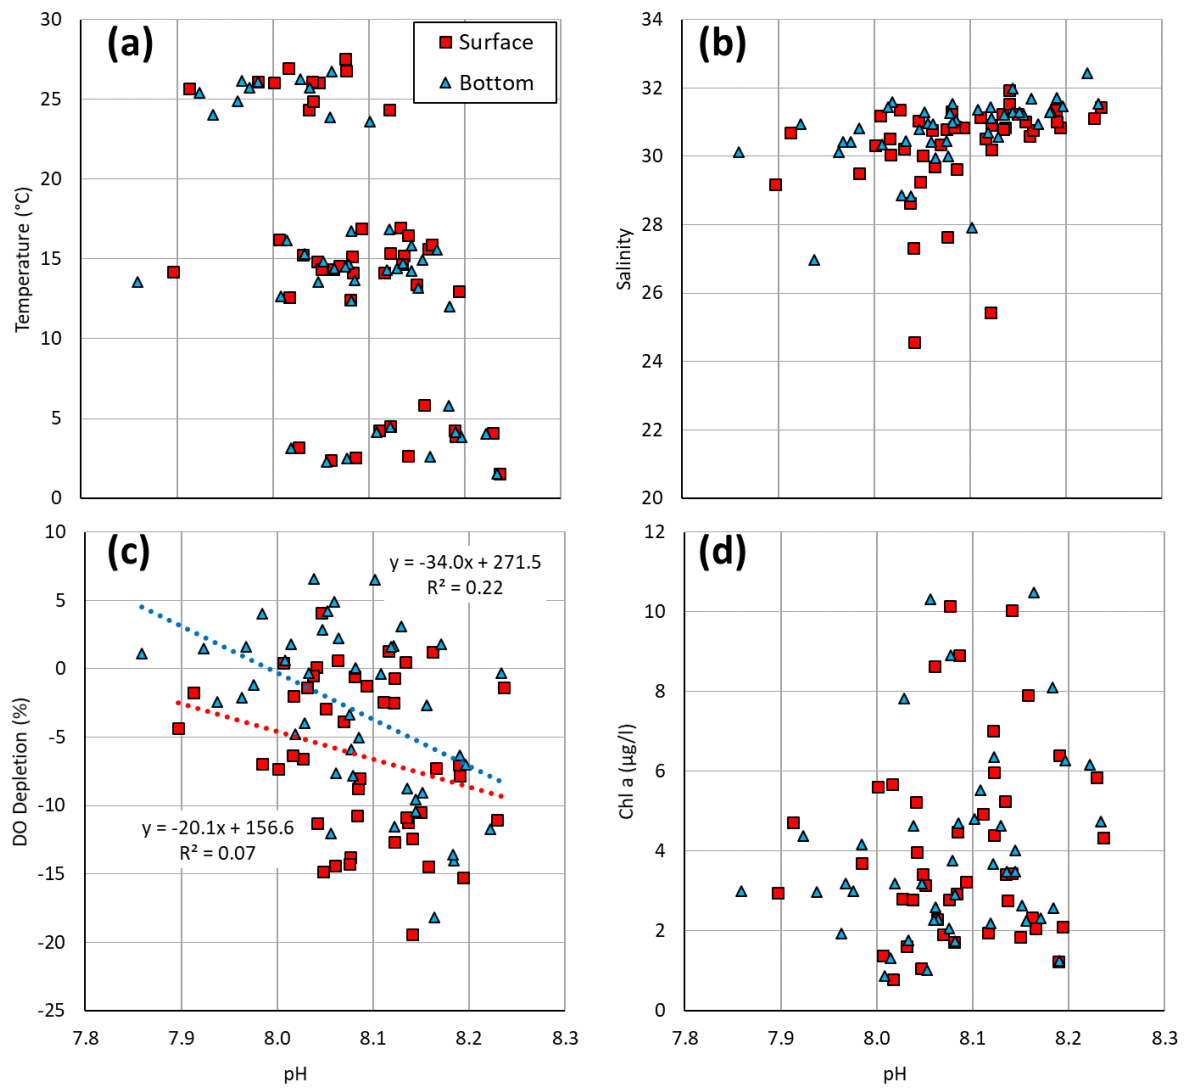

Supplementary Figure 9. Variations of pH with (a) temperature, (b) salinity, (c) DO depletion, and (d) chlorophyll-a in waters from the west coast of Korea.

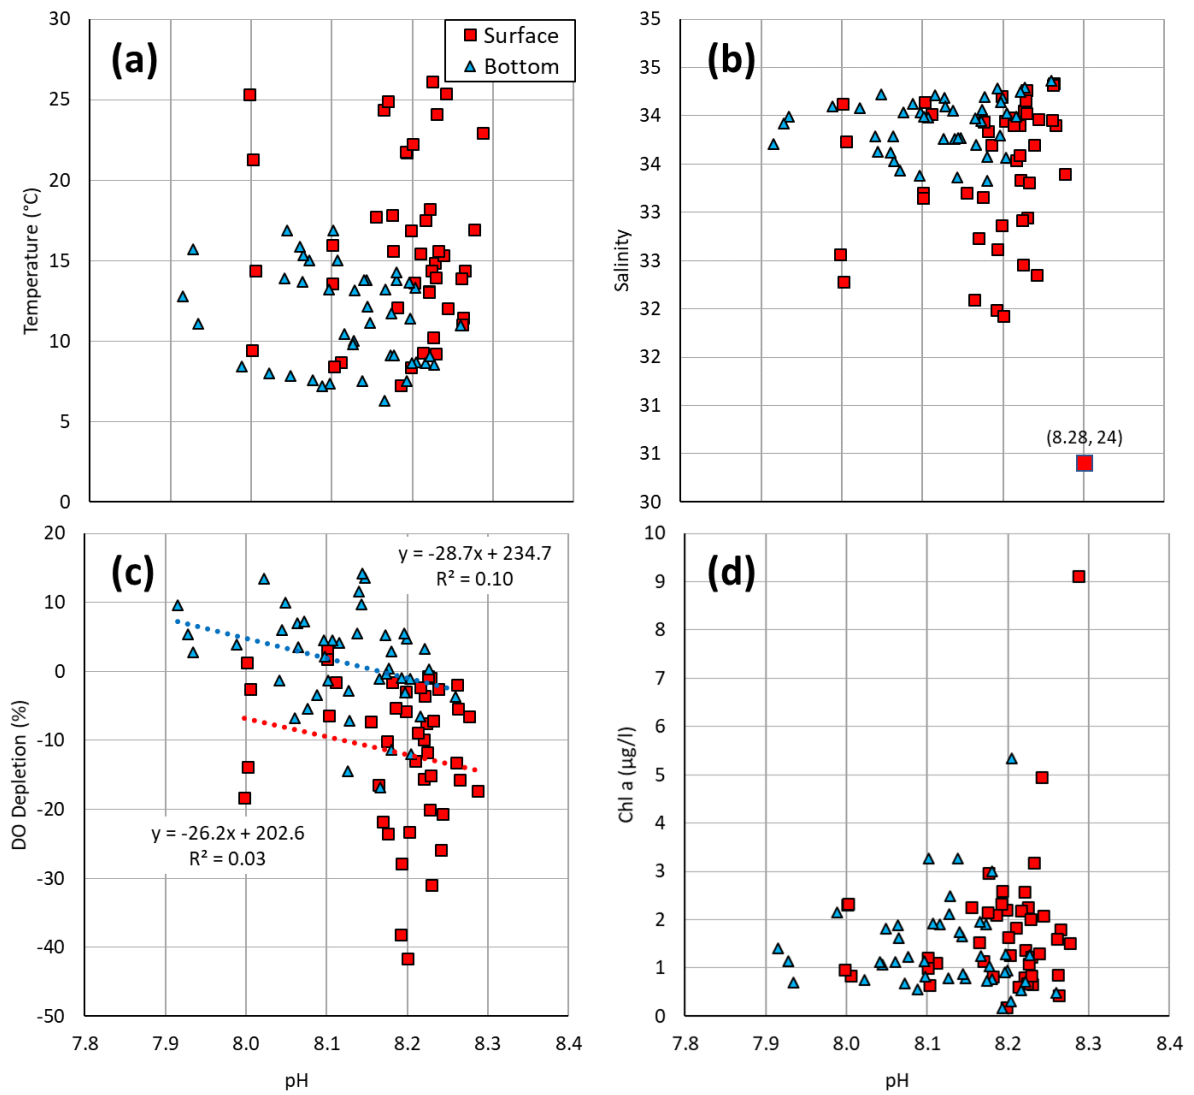

Supplementary Figure 10. Variations of pH with (a) temperature, (b) salinity, (c) DO depletion, and (d) chlorophyll-a in waters from the east coast of Korea.

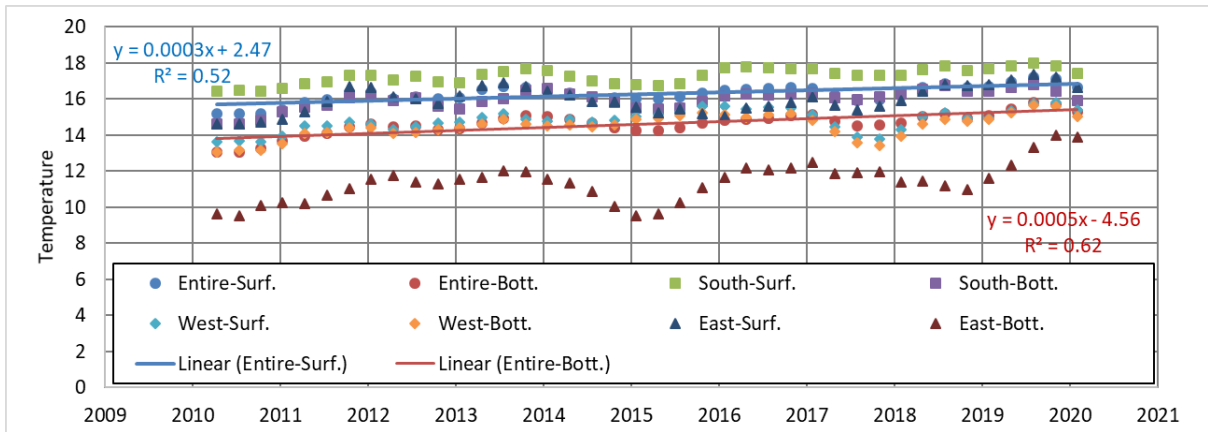

Supplementary Figure 11. Centered moving average with cycle of 4 (quarters).
